# Supplementary material for: Dexamethasone and Dexamethasone Phosphate: Effect on DMPC Membrane Models
Source: MDPI journal article supplement (doi:10.3390/pharmaceutics15030844), 2023-03-04
Supplement: s1 [file s1]

## SUPPLEMENTARY MATERIAL

### Dexamethasone and Dexamethasone phosphate: Effect on DMPC membrane models.

Candelaria Ines Cámara<sup>1,2,\*</sup>, Matías Ariel Crosio<sup>3,4</sup>, Ana Valeria Juarez<sup>1,2</sup> and Natalia Wilke<sup>3,4</sup>

<sup>1</sup> Facultad de Ciencias Químicas, Departamento de Fisicoquímica, Universidad Nacional de Córdoba, X5000HUA Córdoba, Argentina;

<sup>2</sup> Consejo Nacional de Investigaciones Científicas y Técnicas, CONICET, Instituto de Investigaciones en Fisicoquímica de Córdoba, INFIQC, X5000HUA Córdoba, Argentina.

<sup>3</sup> Facultad de Ciencias Químicas, Departamento de Química Biológica Ranwel Caputto, Universidad Nacional de Córdoba, X5000HUA Córdoba, Argentina

<sup>4</sup> Consejo Nacional de Investigaciones Científicas y Técnicas, CONICET, Centro de Investigaciones en Química Biológica de Córdoba, CIQUIBIC, X5000HUA Córdoba, Argentina.

\* Correspondence: candelaria\_camara@unc.edu.ar; Tel.: +54 9 351 5353570.

*Giant Unilamellar vesicles (GUVs), fluctuation analysis.*

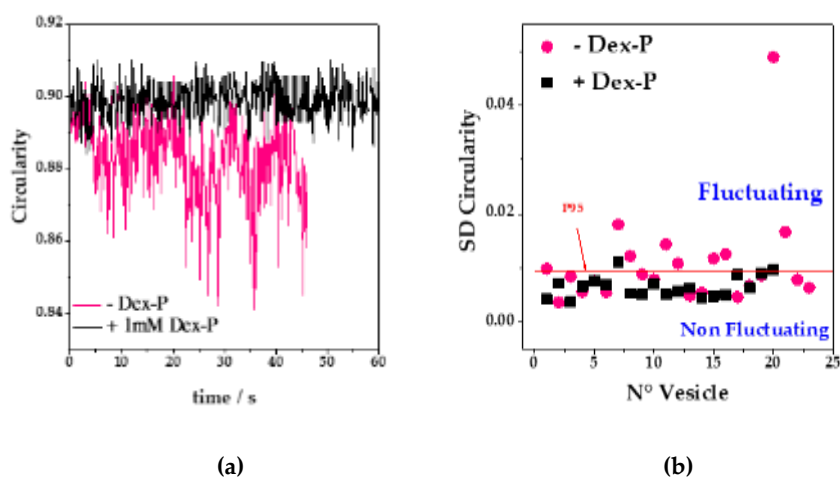

**Figure S1:** (a) Demonstrative image of Circularity a function of the time for a fluctuating (pink) and non- fluctuating (black) vesicle. (b) Standard deviation of  $\bar{C}$  ( $SD\bar{C}$ ) as function of vesicle number. In absence (pink) and presence (black) of Dex-P 1 mM. The straight line corresponds to the P95<sup>th</sup> value used to classify the vesicles in fluctuating or non-fluctuating.

| Condition | P(95) G1 |                             |
|-----------|----------|-----------------------------|
| - Dex-P   | 0.018    |                             |
| + Dex-P   | 0.0087   | Less fluctuating population |
| -Dex      | 0.01041  | Less fluctuating population |
| + Dex     | 0.01276  |                             |

**Table S1:** Calculated P95th for each condition. The lower value of P95 correspond to the less fluctuating population and is the limit above which the vesicle is consider fluctuating.

Langmuir Isotherm:

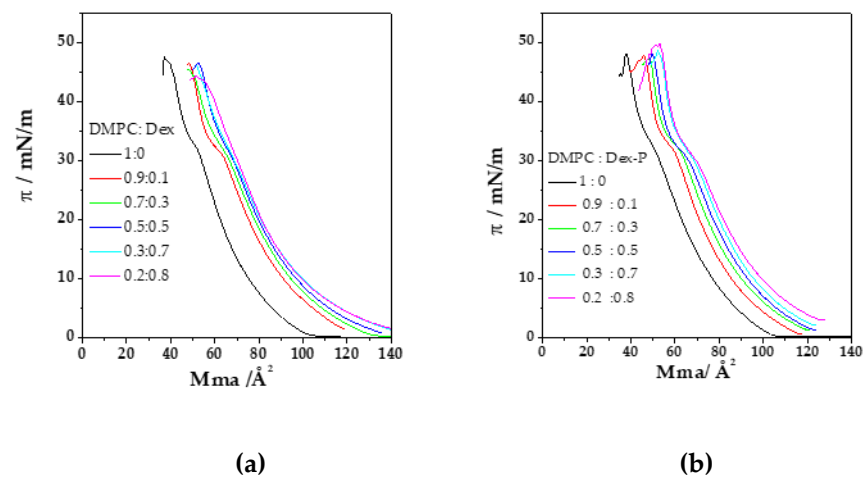

**Figure S2:** Surface pressure – lipid average molecular area compression isotherm for different mixtures DMPC: X were X: (a) Dex and (b) Dex-P. Inset: Compressibility coefficient as function of the surface pressure. DMPC : X molar fraction; 1: 0 (black), 0.9:0.10(red), 0.7:0.3 (green), 0.5:0.5 (blue), 0.30:0.7 (cyan) and 0.2:0.8 (magenta). **Experimental conditions:** 150 mM NaCl, Compression rate 5 mm/min, T: 15° C.

Brewster Angle Microscopy:

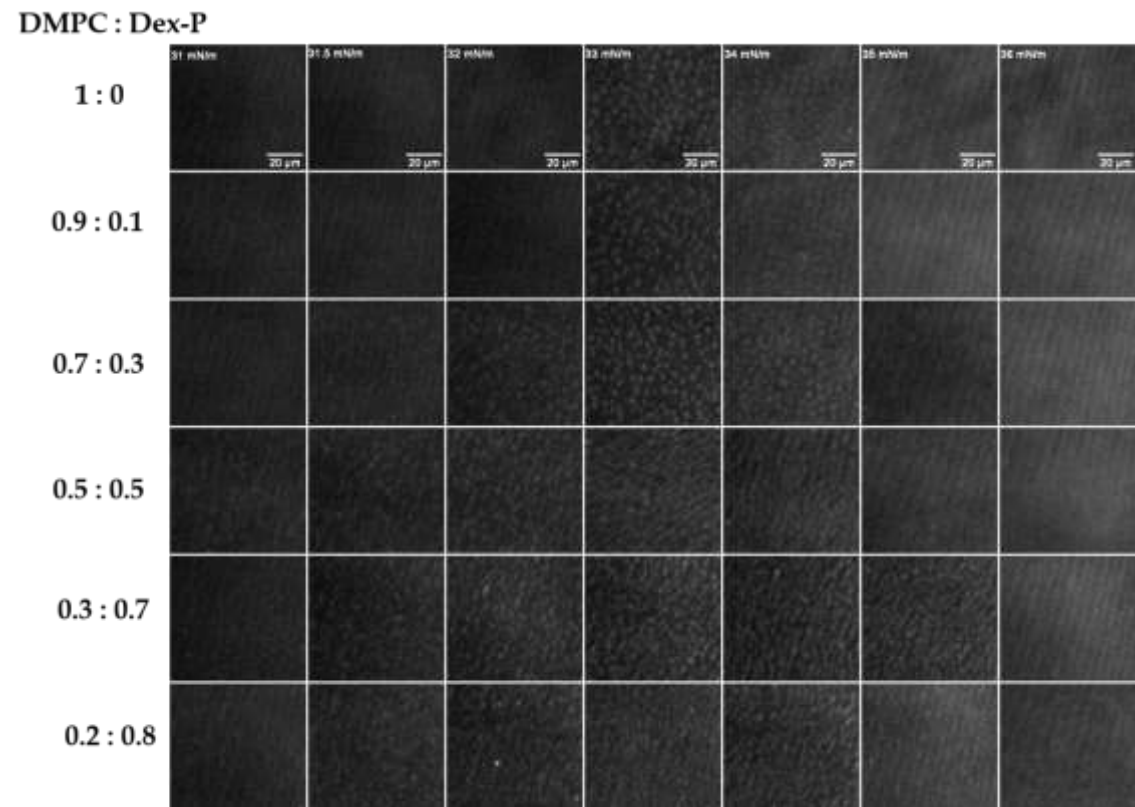

**Figure S3:** Brewster angle images at different surface pressures for DMP: Dex-P, the images correspond to the Langmuir isotherm shown in Figure 2b. For a better visualization the images brightness were adjusted from 0-255 to 8-60.

## DMPC : Dex

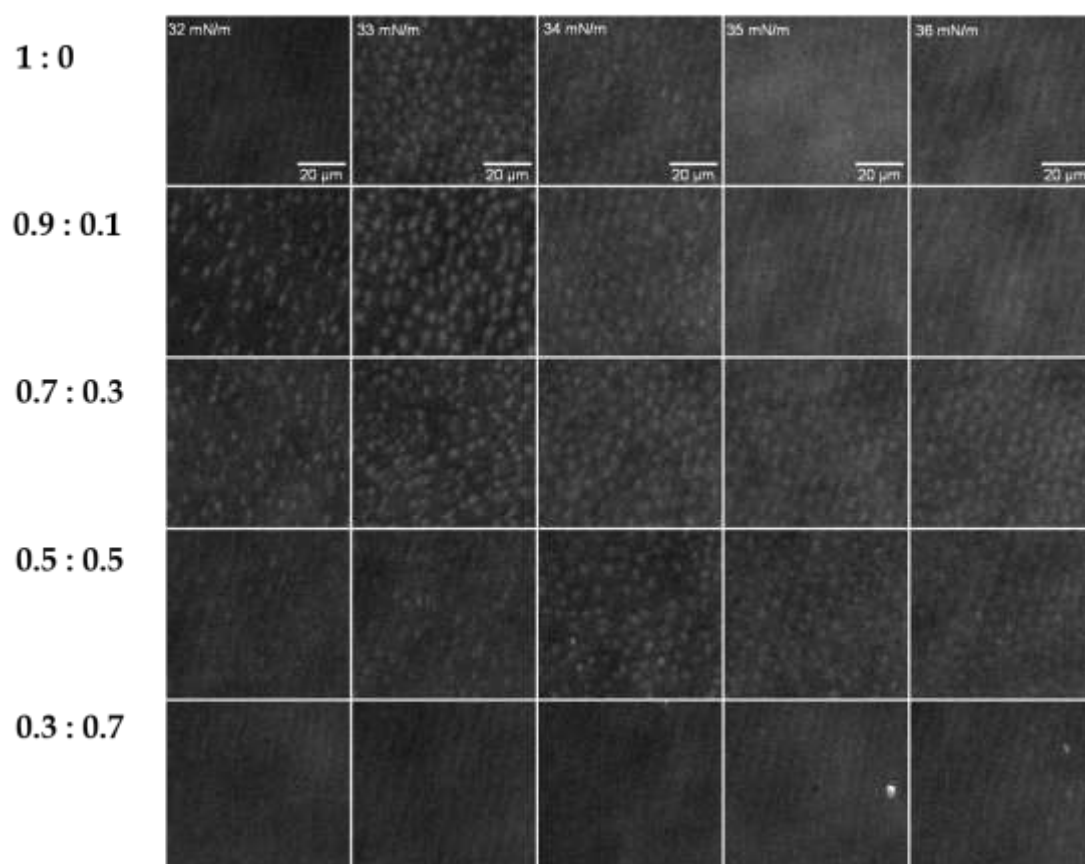

**Figure S4:** Brewster angle images at different surface pressures for DMPC: Dex, the images correspond to the Langmuir isotherm shown in Figure 2a. For a better visualization the images brightness were adjusted from 0-255 to 8-60.

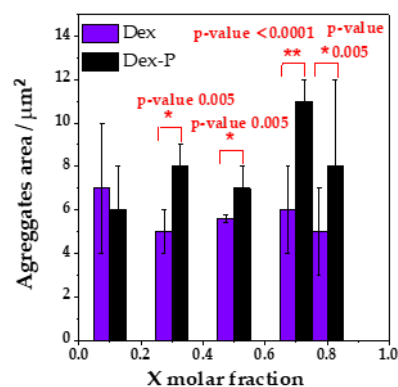

**Figure S5:** Aggregates area ( $\mu\text{m}^2$ ) as function of the drug molar fraction X (X: Dex or Dex-P). The values were obtained from BAM images shown in Fig 3a-b, as an average of the different pressures (isn't an aggregate size tendency on pressure), three images for pressure and two independent experiments at each molar fraction. An independent t-test was done at fixed molar fraction to evaluate if there is a significant difference between the aggregates area obtained for Dex and Dex-P. The significance level for the test was  $\alpha = 0.05$ . \*, \*\* there is a significative difference between Dex and Dex-P aggregate area.

| Dex molar fraction | Pearson coefficient | p-value | Dex-P molar fraction | Pearson coefficient | p-value |
|--------------------|---------------------|---------|----------------------|---------------------|---------|
| 0.1                | -0.15               | 0.32    | 0.1                  | -0.22               | 0.22    |
| 0.3                | 0.19                | 0.21    | 0.3                  | -0.15               | 0.23    |
| 0.5                | 0.11                | 0.09    | 0.5                  | 0.08                | 0.49    |
| 0.7                | 0.10                | 0.09    | 0.7                  | 0.12                | 0.16    |
| 0.8                | 0.02                | 0.72    | 0.8                  | 0.13                | 0.09    |

**Table S2:** Pearson coefficient and associated p-value, for the correlation analysis of aggregate reflectivity vs lateral surface pressure, at all drug molar fraction for Dex and Dex-P. The significance level for the test was  $\alpha = 0.05$ . In all cases p-value  $> \alpha$ . There is not statical sufficient evidence to reject the non-linear association between  $R_p$  and the lateral pressure.

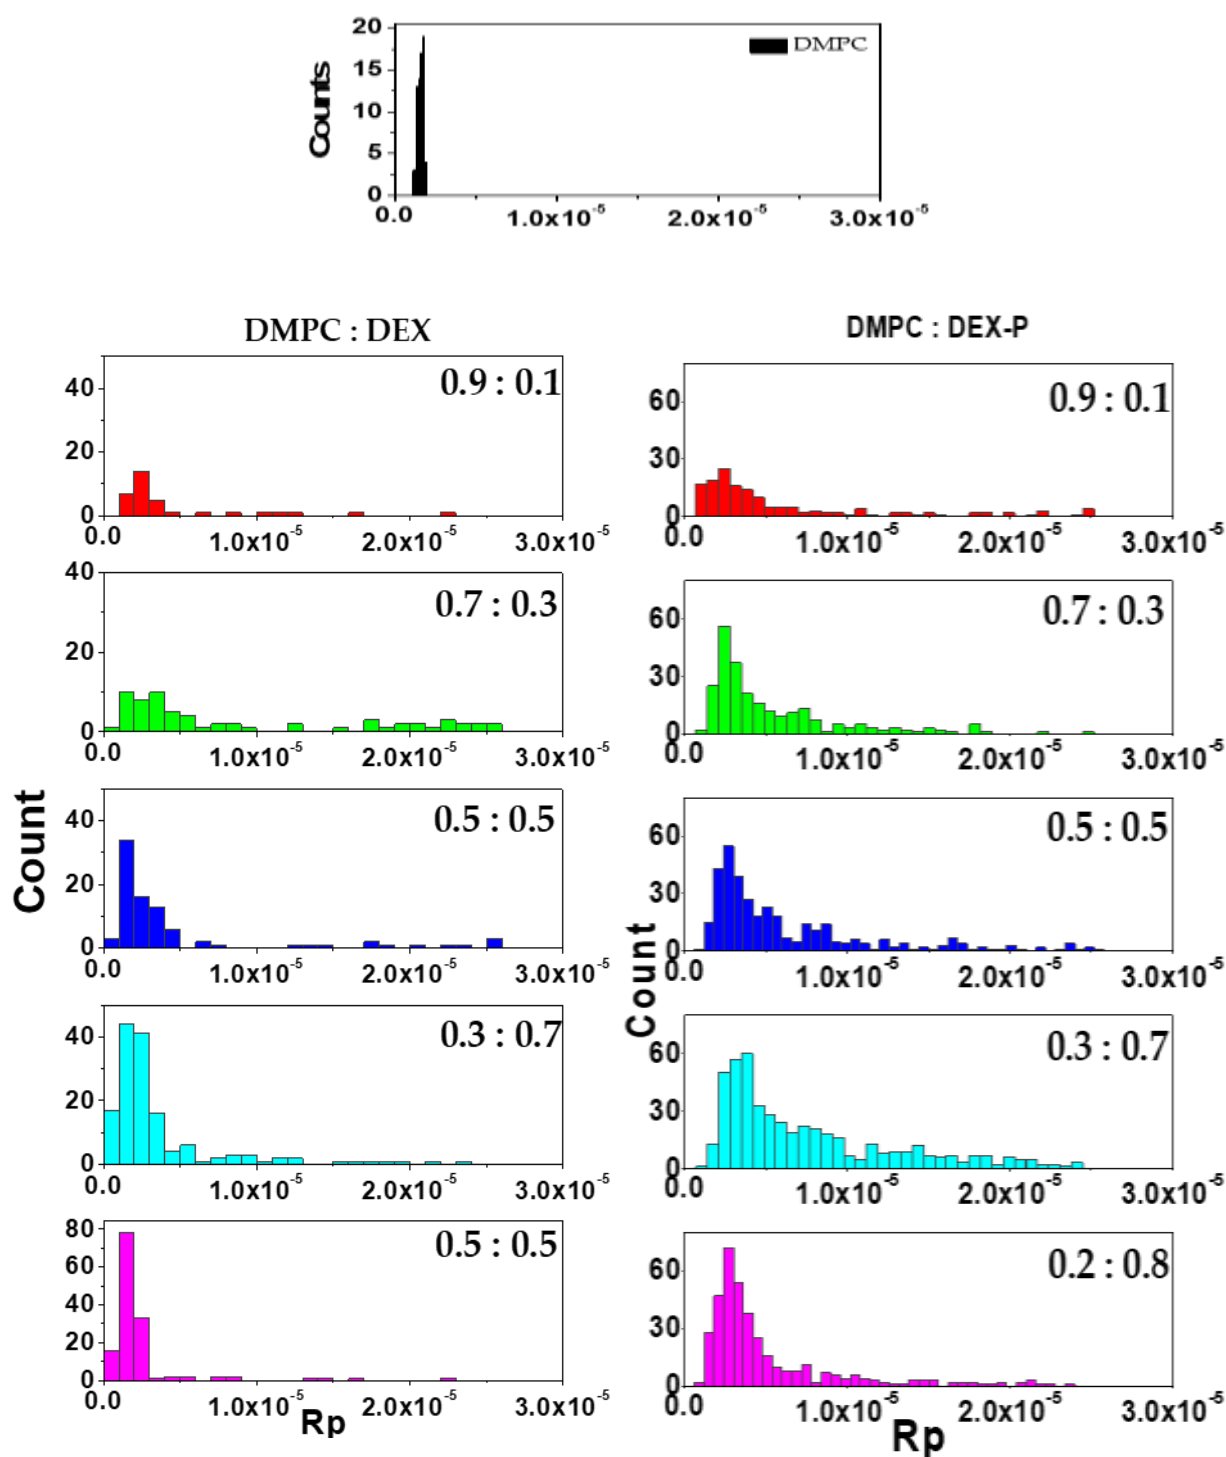

**Figure S6:** Absolute frequency a function of the reflectivity, for the aggregates present on BAM images. (a) DMPC  $R_p$  in the FC phase; DMPC:X for X: (b) DEX and (c) DEX-P. From top to down increasing X molar fraction. Bin size  $0.7 \times 10^{-7}$ . The  $R_p$  value is independent of the surface pressure. The values were obtained from BAM images shown in Fig 4a-b. **Experimental conditions:** 150 mM NaCl, scan rate 5 mm/min, T: 15° C.
